# Supplementary material for: Influence of the central diamagnetic cyanidometal on the distant magnetic interaction in cyanide-bridged Fe(iii)–M(ii)–Fe(iii) complexes
Source: Royal Society of Chemistry journal article supplement (doi:10.1039/c5dt00383k), 2015-01-01
Supplement: c5dt00383k1.pdf [file c5dt00383k1.pdf]

## Supporting Information

# Influence of the central diamagnetic cyanidometal on the distant magnetic interaction in cyanide-bridged Fe(III)-M(II)-Fe(III) complexes?

Yong Wang,<sup>a</sup> Chensheng Lin,<sup>a</sup> Xiao Ma,<sup>a</sup> Zhenzhen Xue,<sup>a</sup> Xiaoquan Zhu,<sup>a</sup> Wenhai Cao,<sup>a</sup> Shengmin Hu,<sup>a</sup> Tianlu Sheng,<sup>\*a</sup> and Xintao Wu<sup>a</sup>

<sup>a</sup> State Key Laboratory of Structure Chemistry, Fujian Institute of Research on the Structure of Matter, Chinese Academy of Sciences, Fuzhou, 350002, Fujian, P.R. China

### TDDFT Calculations

For the singly oxidized species **5** and **6**, it is difficult to attribute the absorption bands in the NIR region, because three assignments are possible: 1) the central Os<sup>II</sup> → terminal Fe<sup>III</sup> MMCT; 2) the distant terminal Fe<sup>II</sup> → terminal Fe<sup>III</sup> MMCT; 3) the mixture of the central Os<sup>II</sup> → terminal Fe<sup>III</sup> and the terminal Fe<sup>II</sup> → terminal Fe<sup>III</sup> MMCTs. In order to accurately assign the absorption bands in the NIR regions of **5** and **6**, the TDDFT calculations have been done. The redistributions of electron densities are shown in Figures S3 and S4 for **5** and **6**, respectively. The frontier orbitals of complexes **5** and **6** in the CH<sub>3</sub>CN solution are shown in Figures S5-S8. The calculated vertical excitation energies and contribution of complexes **5** and **6** are listed in Table S1. The calculated maximum absorption wavelengths in the NIR region are 819.7 nm for **5** and 823.2 nm for **6**, respectively. These are in accordance with the experimental data (910 nm for **5** and 912 nm for **6**). From the redistribution of electron densities (Figures S3 and S4), it can be found that the flow of electrons largely comes from the mixture of the central Os<sup>II</sup> → terminal Fe<sup>III</sup> and the distant terminal Fe<sup>II</sup> → terminal Fe<sup>III</sup> MMCTs. Furthermore, the frontier molecular orbital analysis indicates that the broad band at 910 nm for **5** and 912 nm for **6** are mainly assigned to the molecular orbital  $\beta$  electron HOMO-1 → LUMO transition.

### Computational Methods.

All calculations have been performed with the Gaussian 09 program package. The geometry of complexes **5** and **6** were optimized at the B3LYP level with LANL2DZ basis set for atoms C, H, N, Os

and Fe and 6-31+G\* basis set for atom P. TDDFT calculation was done based on these optimized structure. The solvent effect (acetonitrile) was taken into account by using the PCM approximation<sup>[1]</sup> in these calculations.

- [1] R. Improta, V. Barone, G. Scalmani, M. J. Frisch, *J. Chem. Phys.* **2006**, *125*, 054103: 054101-054109.

**Table S1.** Crystallographic Data and Details of Structure Determination for **1-3**.

|                                                  | <b>1·2Et<sub>2</sub>O·CH<sub>2</sub>Cl<sub>2</sub></b>                                                                            | <b>2·4CH<sub>2</sub>Cl<sub>2</sub></b>                                                                              | <b>3·2CH<sub>2</sub>Cl<sub>2</sub>·C<sub>4</sub>H<sub>10</sub>O</b>                                           |
|--------------------------------------------------|-----------------------------------------------------------------------------------------------------------------------------------|---------------------------------------------------------------------------------------------------------------------|---------------------------------------------------------------------------------------------------------------|
| Chemical formula                                 | C <sub>93</sub> H <sub>96</sub> Cl <sub>2</sub> F <sub>12</sub> Fe <sub>2</sub> N <sub>6</sub> O <sub>2</sub><br>OsP <sub>6</sub> | C <sub>92</sub> H <sub>82</sub> Cl <sub>8</sub> F <sub>12</sub> Fe <sub>2</sub> N <sub>6</sub> Os<br>P <sub>6</sub> | C <sub>90</sub> H <sub>88</sub> Cl <sub>4</sub> F <sub>12</sub> Fe <sub>3</sub> N <sub>6</sub> P <sub>6</sub> |
| Formula weight                                   | 2116.38                                                                                                                           | 2270.96                                                                                                             | 1992.83                                                                                                       |
| Colour and Habit                                 | Red needle                                                                                                                        | Red needle                                                                                                          | Gray prism                                                                                                    |
| Crystal Size / mm                                | 0.45×0.04×0.03                                                                                                                    | 0.56×0.05×0.04                                                                                                      | 0.79×0.17×0.05                                                                                                |
| <i>T</i> / K                                     | 123                                                                                                                               | 123                                                                                                                 | 123                                                                                                           |
| Crystal system                                   | Monoclinic                                                                                                                        | Orthorhombic                                                                                                        | Monoclinic                                                                                                    |
| Space group                                      | <i>P2<sub>1</sub>/n</i>                                                                                                           | <i>Pbca</i>                                                                                                         | <i>P2<sub>1</sub>/c</i>                                                                                       |
| <i>a</i> / Å                                     | 11.259(7)                                                                                                                         | 28.108(11)                                                                                                          | 11.294(5)                                                                                                     |
| <i>b</i> / Å                                     | 34.410(18)                                                                                                                        | 20.092(8)                                                                                                           | 33.956(14)                                                                                                    |
| <i>c</i> / Å                                     | 23.606(14)                                                                                                                        | 33.297(14)                                                                                                          | 25.136(10)                                                                                                    |
| <i>α</i> / °                                     | 90.00                                                                                                                             | 90.00                                                                                                               | 90.00                                                                                                         |
| <i>β</i> / °                                     | 95.685(12)                                                                                                                        | 90.00                                                                                                               | 110.097(17)                                                                                                   |
| <i>γ</i> / °                                     | 90.00                                                                                                                             | 90.00                                                                                                               | 90.00                                                                                                         |
| <i>V</i> / Å <sup>3</sup>                        | 9100(9)                                                                                                                           | 18804(13)                                                                                                           | 9053(7)                                                                                                       |
| <i>Z</i>                                         | 4                                                                                                                                 | 8                                                                                                                   | 4                                                                                                             |
| <i>ρ</i> <sub>calcd</sub> (g/cm <sup>3</sup> )   | 1.545                                                                                                                             | 1.604                                                                                                               | 1.462                                                                                                         |
| <i>λ</i> (Mo K <sub>α</sub> , Å)                 | 0.71073                                                                                                                           | 0.71073                                                                                                             | 0.71073                                                                                                       |
| <i>μ</i> (Mo K <sub>α</sub> , mm <sup>-1</sup> ) | 1.948                                                                                                                             | 2.055                                                                                                               | 0.773                                                                                                         |
| Completeness                                     | 98.1%                                                                                                                             | 98.1%                                                                                                               | 98.3%                                                                                                         |
| <i>F</i> (000)                                   | 4288                                                                                                                              | 9104                                                                                                                | 4088                                                                                                          |
| <i>h, k, l</i> , range                           | -13 ≤ <i>h</i> ≤ 13,<br>-40 ≤ <i>k</i> ≤ 40,<br>-28 ≤ <i>l</i> ≤ 28                                                               | -33 ≤ <i>h</i> ≤ 33,<br>-23 ≤ <i>k</i> ≤ 23,<br>-39 ≤ <i>l</i> ≤ 39                                                 | -12 ≤ <i>h</i> ≤ 14,<br>-42 ≤ <i>k</i> ≤ 44,<br>-32 ≤ <i>l</i> ≤ 32                                           |
| <i>θ</i> range / deg                             | 2.70-25.00                                                                                                                        | 2.12-25.00                                                                                                          | 2.01-27.50                                                                                                    |
| Reflections measured                             | 15727                                                                                                                             | 16241                                                                                                               | 20455                                                                                                         |
| <i>R</i> <sub>int</sub>                          | 0.0946                                                                                                                            | 0.1451                                                                                                              | 0.1141                                                                                                        |
| Params/restraints/<br>Data(obs.)                 | 1171/708/11833                                                                                                                    | 1180/117/11594                                                                                                      | 1182/191/11924                                                                                                |
| GOF                                              | 1.047                                                                                                                             | 1.064                                                                                                               | 1.012                                                                                                         |

|                                     |                |                |                |
|-------------------------------------|----------------|----------------|----------------|
| $R_1, \omega R_2 (I > 2 \sigma(I))$ | 0.0989, 0.1993 | 0.1132, 0.2050 | 0.1069, 0.2104 |
| $R_1, \omega R_2$ (all data)        | 0.1254, 0.2151 | 0.1418, 0.2239 | 0.1488, 0.2354 |

**Table S2.** Selected Bond Distances (Å) and Bond Angles (°) for **1-3**.

|                      | <b>1</b>  | <b>2</b>  |                      | <b>3</b> |
|----------------------|-----------|-----------|----------------------|----------|
| Os-C1                | 1.953(13) | 1.997(13) | Fe3-C1               | 1.932(7) |
| Os-C2                | 1.976(14) | 2.003(13) | Fe3-C2               | 1.921(7) |
| Os-N3                | 2.105(10) | 2.111(9)  | Fe3-N3               | 1.984(4) |
| Os-N4                | 2.064(10) | 2.070(10) | Fe3-N4               | 1.998(6) |
| Os-N5                | 2.052(10) | 2.090(10) | Fe3-N5               | 1.983(5) |
| Os-N6                | 2.074(10) | 2.106(9)  | Fe3-N6               | 1.984(5) |
| C1≡N1                | 1.233(15) | 1.171(14) | C1≡N1                | 1.157(8) |
| C2≡N2                | 1.199(15) | 1.181(14) | C2≡N2                | 1.155(8) |
| Fe1-N1               | 1.905(10) | 1.898(9)  | Fe1-N1               | 1.930(6) |
| Fe2-N2               | 1.907(10) | 1.902(9)  | Fe2-N2               | 1.921(5) |
| Fe1-P1               | 2.197(4)  | 2.200(4)  | Fe1-P1               | 2.205(2) |
| Fe1-P2               | 2.189(5)  | 2.195(3)  | Fe1-P2               | 2.191(2) |
| Fe2-P3               | 2.202(4)  | 2.195(4)  | Fe2-P3               | 2.212(2) |
| Fe2-P4               | 2.192(4)  | 2.189(3)  | Fe2-P4               | 2.193(2) |
| C1-Os-C2             | 94.2(5)   | 92.1(4)   | C1-Fe3-C2            | 91.9(3)  |
| N1≡C1-Os             | 179.3(11) | 177.2(10) | N1≡C1-Fe3            | 174.4(6) |
| N2≡C2-Os             | 176.7(10) | 177.7(10) | N2≡C2-Fe3            | 172.4(6) |
| C1≡N1-Fe1            | 171.0(9)  | 178.6(10) | C1≡N1-Fe1            | 174.7(5) |
| C2≡N2-Fe2            | 178.2(10) | 173.7(9)  | C2≡N2-Fe2            | 176.2(5) |
| Os...Fe1             | 5.091     | 5.066     | Fe3...Fe1            | 5.019    |
| Os...Fe2             | 5.082     | 5.084     | Fe3...Fe2            | 5.000    |
| Fe1...Fe2            | 7.652     | 7.592     | Fe1...Fe2            | 7.602    |
| Fe1...Fe2(-NC-Os-CN) | 10.173    | 10.150    | Fe1...Fe2(-NC-Fe-CN) | 10.019   |

**Table S3.** Calculated Vertical Excitation Energies in nm for Complexes **5** and **6**.

| <b>5</b> , $\alpha$ electron (HOMO: 363 $\alpha$ ; LUMO: 364 $\alpha$ ),<br>$\beta$ electron (HOMO: 362 $\beta$ ; LUMO: 363 $\beta$ ) |                                                                                                                                                                                                                                                                                                                                         | <b>6</b> , $\alpha$ electron (HOMO: 375 $\alpha$ ; LUMO: 364 $\alpha$ ),<br>$\beta$ electron (HOMO: 362 $\beta$ ; LUMO: 363 $\beta$ ) |                                                                                                                                                                                                                                                                                                                                    |
|---------------------------------------------------------------------------------------------------------------------------------------|-----------------------------------------------------------------------------------------------------------------------------------------------------------------------------------------------------------------------------------------------------------------------------------------------------------------------------------------|---------------------------------------------------------------------------------------------------------------------------------------|------------------------------------------------------------------------------------------------------------------------------------------------------------------------------------------------------------------------------------------------------------------------------------------------------------------------------------|
| $\lambda$ (nm)                                                                                                                        | Contribution (coefficient)                                                                                                                                                                                                                                                                                                              | $\lambda$ (nm)                                                                                                                        | Contribution (coefficient)                                                                                                                                                                                                                                                                                                         |
| 819.7                                                                                                                                 | 337 $\alpha$ →364 $\alpha$ (-0.11995),<br>337 $\alpha$ →365 $\alpha$ (-0.33109),<br>359 $\alpha$ →365 $\alpha$ (-0.14635);<br>360 $\alpha$ →365 $\alpha$ (-0.18472),<br>362 $\alpha$ →365 $\alpha$ (-0.10596),<br>363 $\alpha$ →365 $\alpha$ (-0.14818),<br>353 $\beta$ →367 $\beta$ (-0.17830),<br>356 $\beta$ →367 $\beta$ (0.10701), | 823.2                                                                                                                                 | 347 $\alpha$ →376 $\alpha$ (0.10944),<br>347 $\alpha$ →377 $\alpha$ (0.28429),<br>371 $\alpha$ →377 $\alpha$ (0.12562),<br>372 $\alpha$ →377 $\alpha$ (-0.16878),<br>374 $\alpha$ →377 $\alpha$ (0.10700),<br>375 $\alpha$ →377 $\alpha$ (-0.13084),<br>366 $\beta$ →381 $\beta$ (0.13656),<br>368 $\beta$ →381 $\beta$ (0.11943), |

|                                                                                                                                                                                                     |                                                                                                                                                                                                  |
|-----------------------------------------------------------------------------------------------------------------------------------------------------------------------------------------------------|--------------------------------------------------------------------------------------------------------------------------------------------------------------------------------------------------|
| 357 $\beta$ →363 $\beta$ (-0.21621),<br>359 $\beta$ →363 $\beta$ (-0.37658),<br>360 $\beta$ →363 $\beta$ (-0.11318),<br>360 $\beta$ →367 $\beta$ (-0.11735),<br>361 $\beta$ →363 $\beta$ (0.62523). | 369 $\beta$ →375 $\beta$ (0.21569),<br>371 $\beta$ →375 $\beta$ (0.36866),<br>372 $\beta$ →375 $\beta$ (0.12996),<br>372 $\beta$ →381 $\beta$ (-0.10814),<br>373 $\beta$ →375 $\beta$ (0.65943). |
|-----------------------------------------------------------------------------------------------------------------------------------------------------------------------------------------------------|--------------------------------------------------------------------------------------------------------------------------------------------------------------------------------------------------|

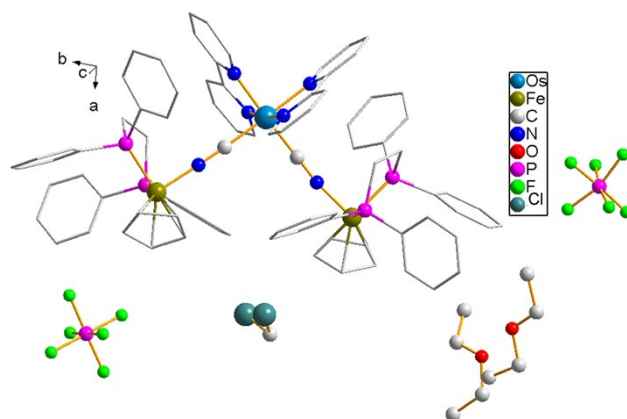

**Figure S1.** Molecular structure of **1**, hydrogen atoms have been removed for clarity.

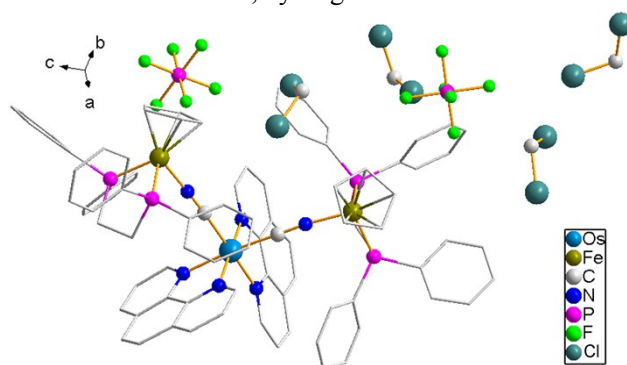

**Figure S2.** Molecular structure of **2**, hydrogen atoms have been removed for clarity.

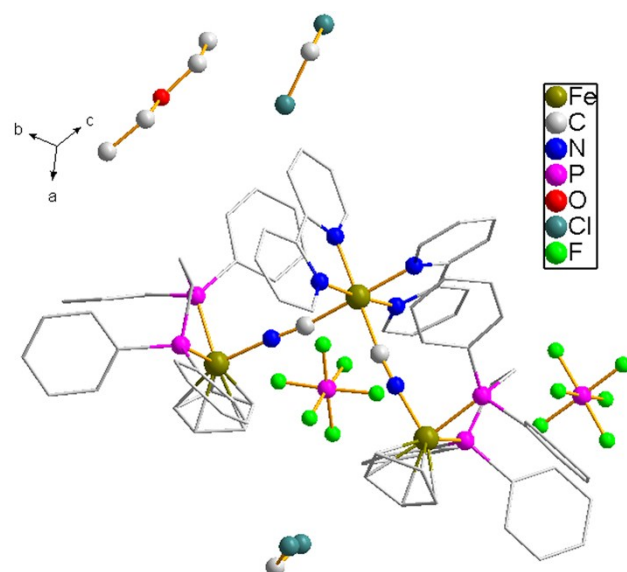

**Figure S3.** Molecular structure of **3**, hydrogen atoms have been removed for clarity.

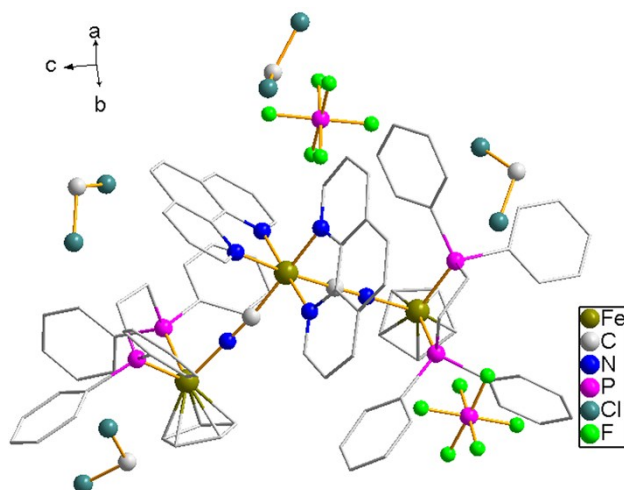

**Figure S4.** Molecular structure of **4**, hydrogen atoms have been removed for clarity.

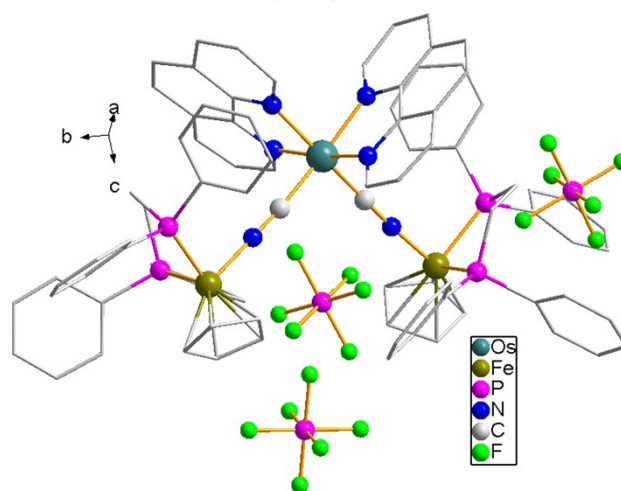

**Figure S5.** Molecular structure of **6**, hydrogen atoms have been removed for clarity.

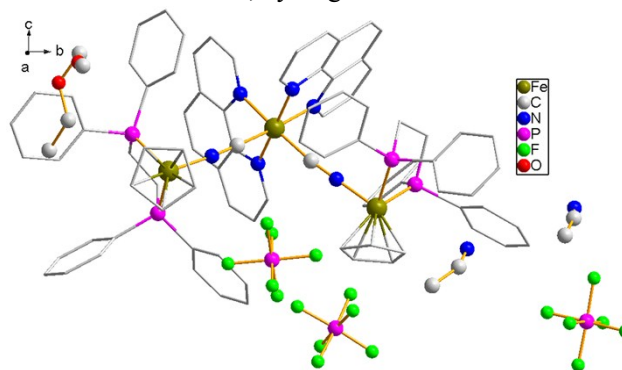

**Figure S6.** Molecular structure of **7**, hydrogen atoms have been removed for clarity.

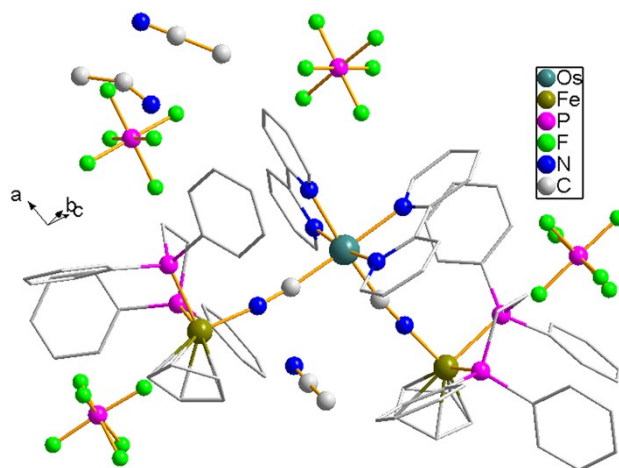

**Figure S7.** Molecular structure of **8**, hydrogen atoms have been removed for clarity.

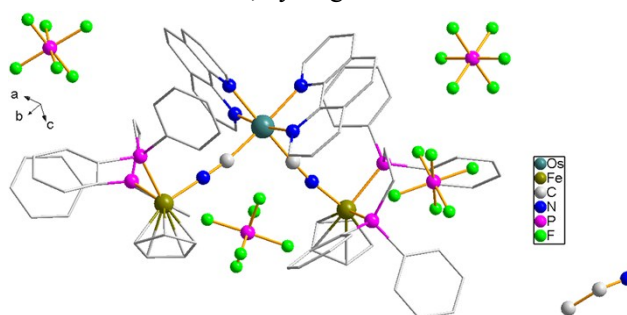

**Figure S8.** Molecular structure of **9**, hydrogen atoms have been removed for clarity.

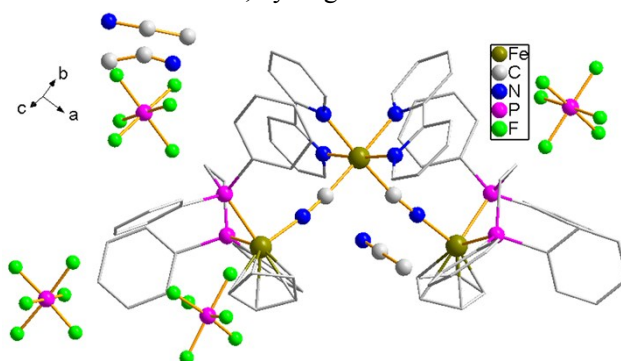

**Figure S9.** Molecular structure of **10**, hydrogen atoms have been removed for clarity.

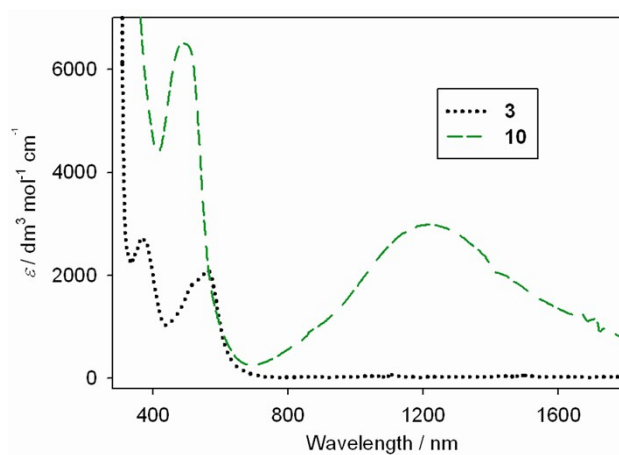

**Figure S10.** Electronic absorption spectra of complexes **3** and **10** in CH<sub>3</sub>CN at room temperature.

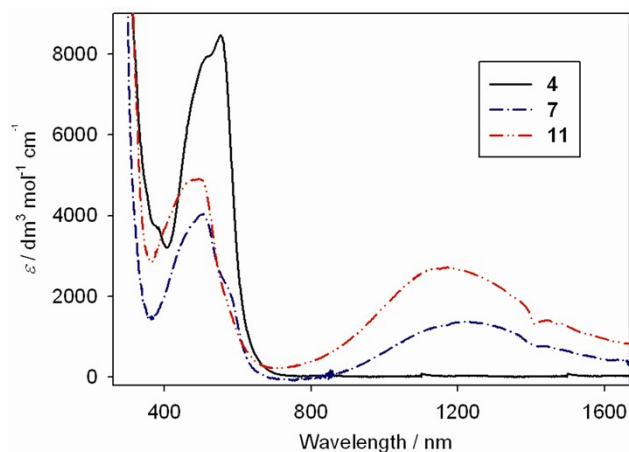

**Figure S11.** Electronic absorption spectra of complexes **4**, **7** and **11** in CH<sub>3</sub>CN at room temperature.

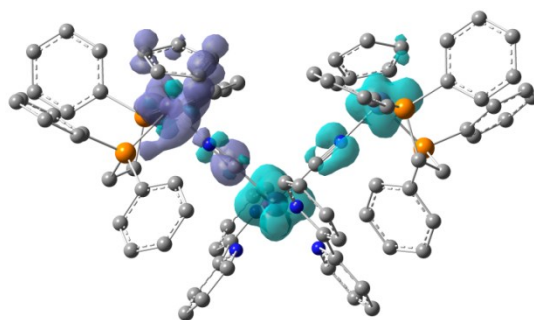

**Figure S12.** Redistribuition of electron densities of **5** in the calculated 819.7 nm transition band.  represents gain of electron density and  represents losses of electron density after transition. The electron density value corresponds to the sosurface of 0.001.

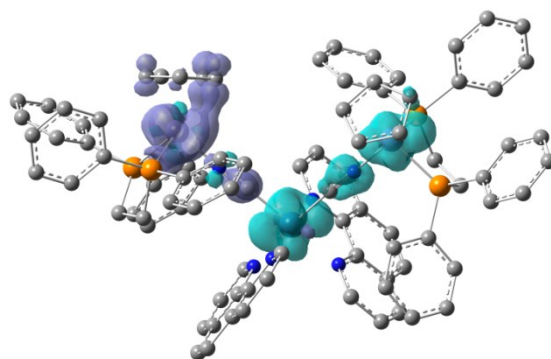

**Figure S13.** Redistribuition of electron densities of **6** in the calculated 823.2 nm transition band.  represents gain of electron density and  represents losses of electron density after transition. The electron density value corresponds to the sosurface of 0.001.

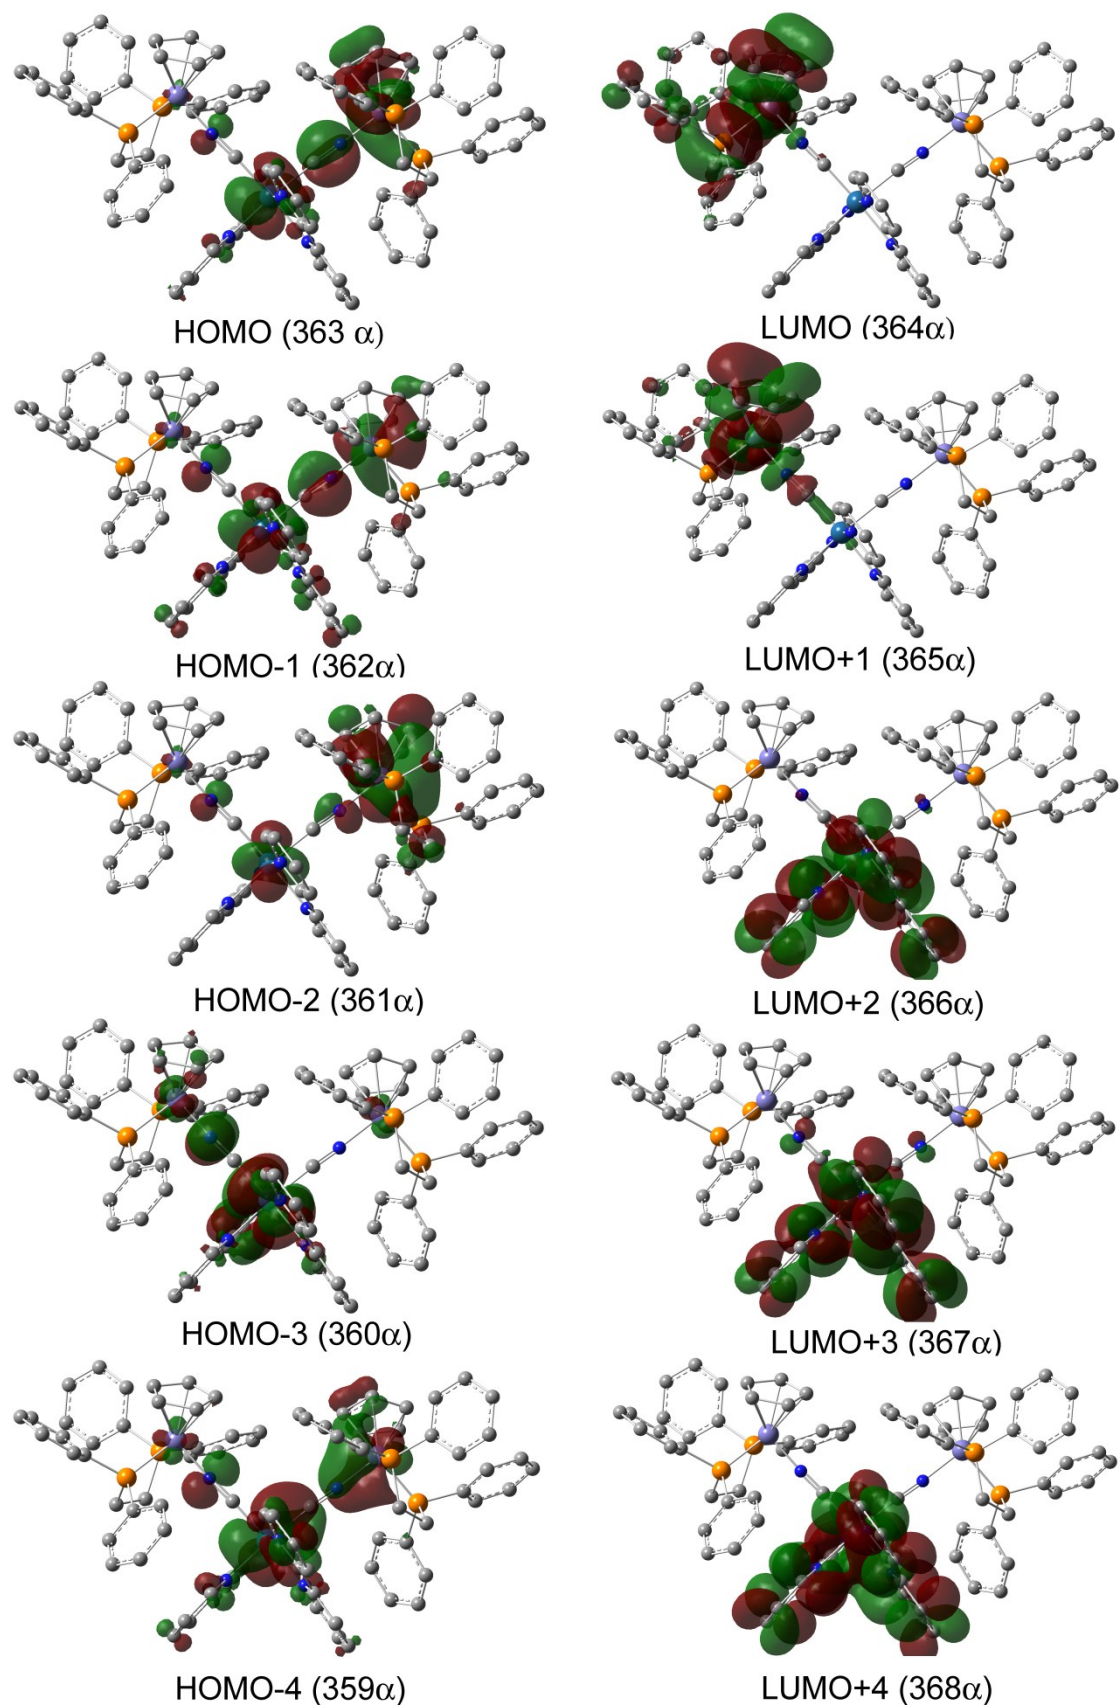

**Figure S14.** Schematic drawings of the selective frontier molecular orbitals for the  $\alpha$  electron of **5**.



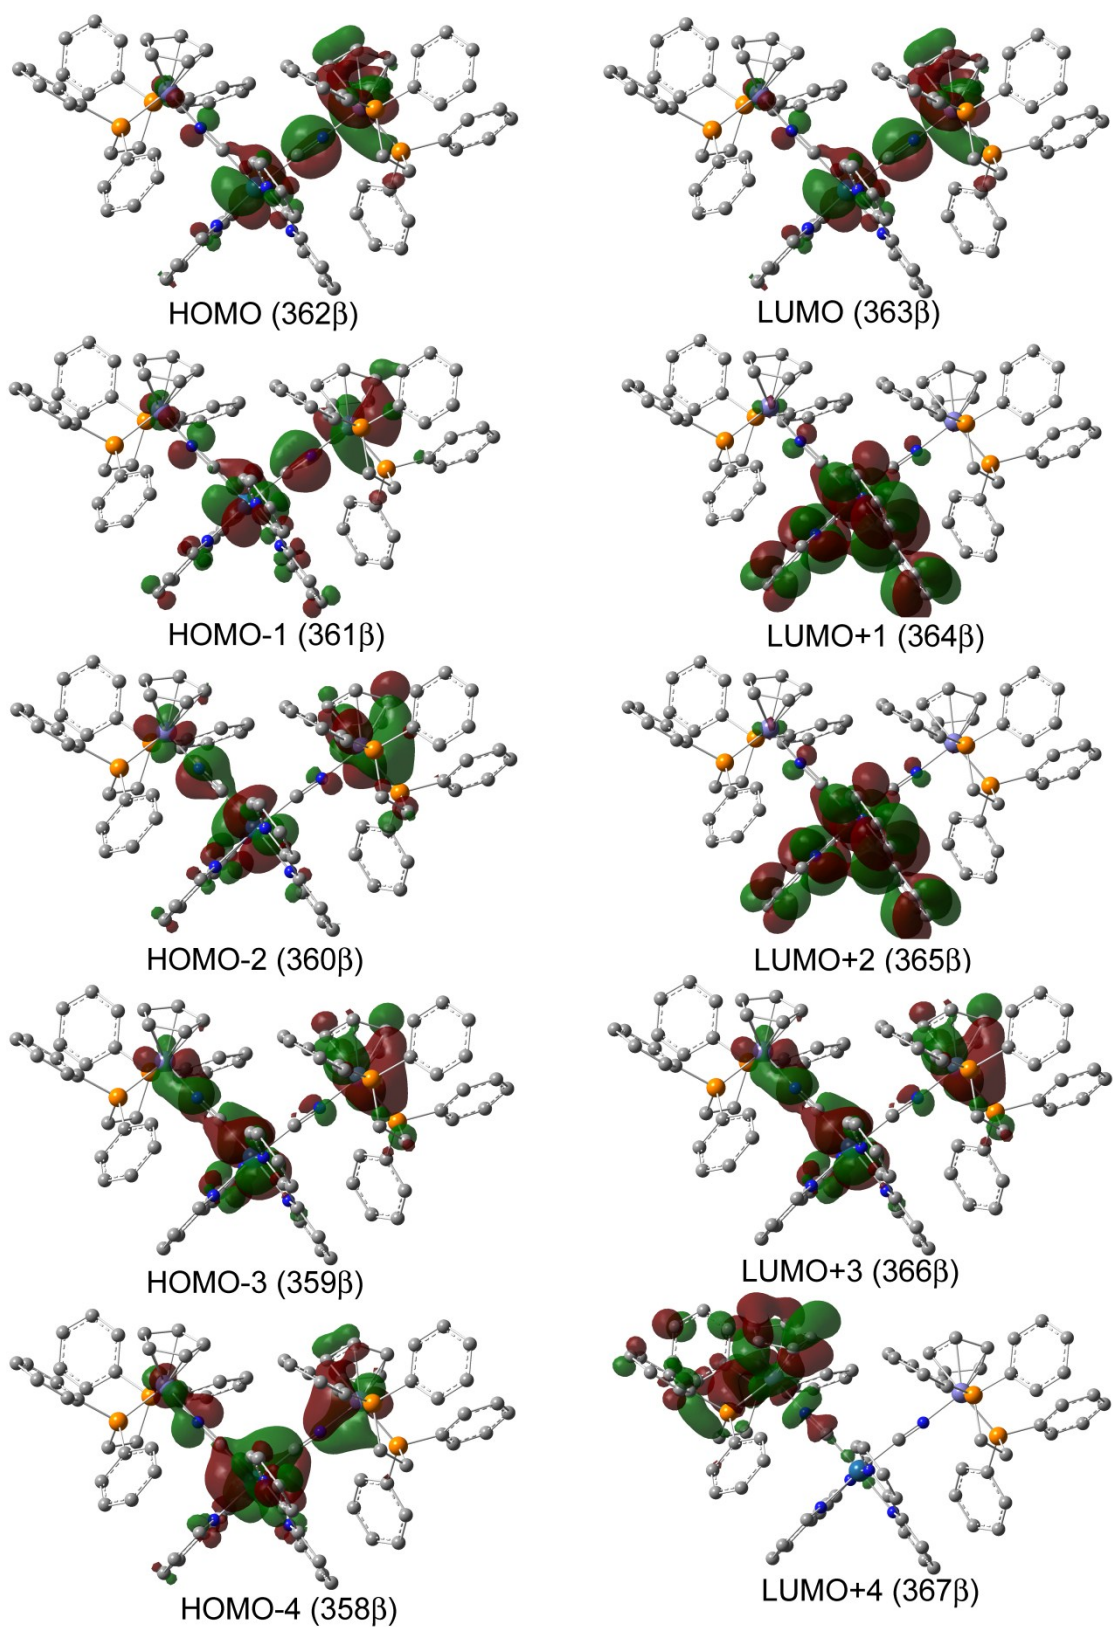

**Figure S15.** Schematic drawings of the selective frontier molecular orbitals for the  $\beta$  electron of **5**.

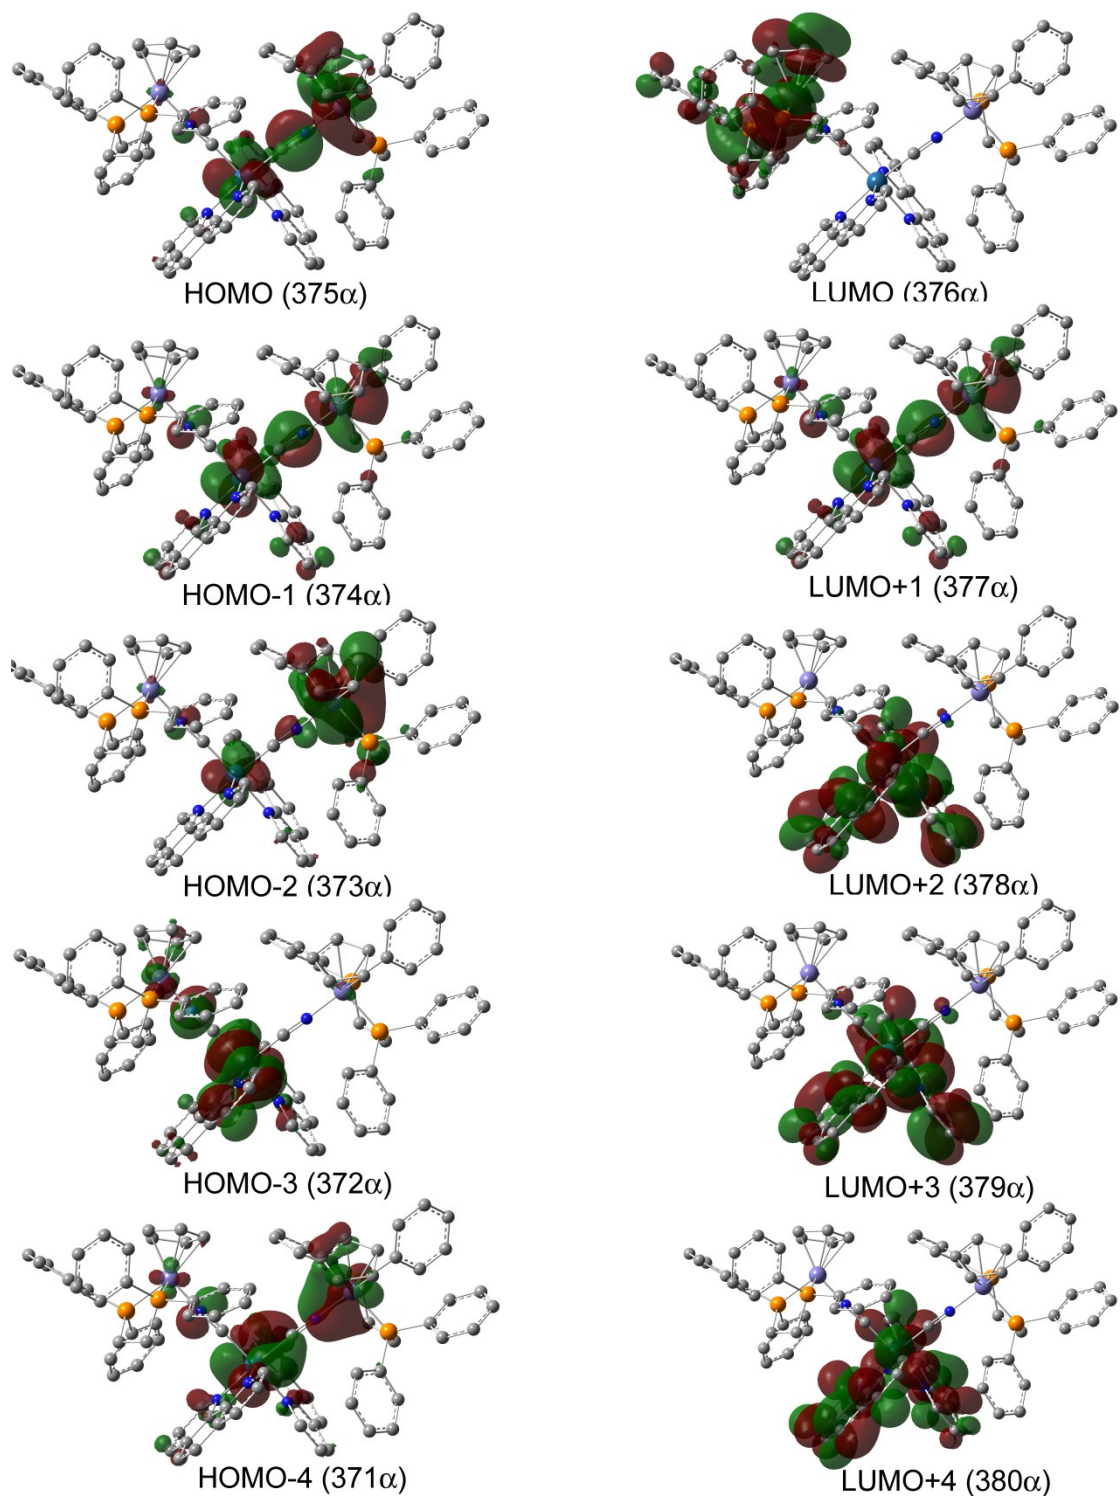

**Figure S16.** Schematic drawings of the selective frontier molecular orbitals for the  $\alpha$  electron of **6**.

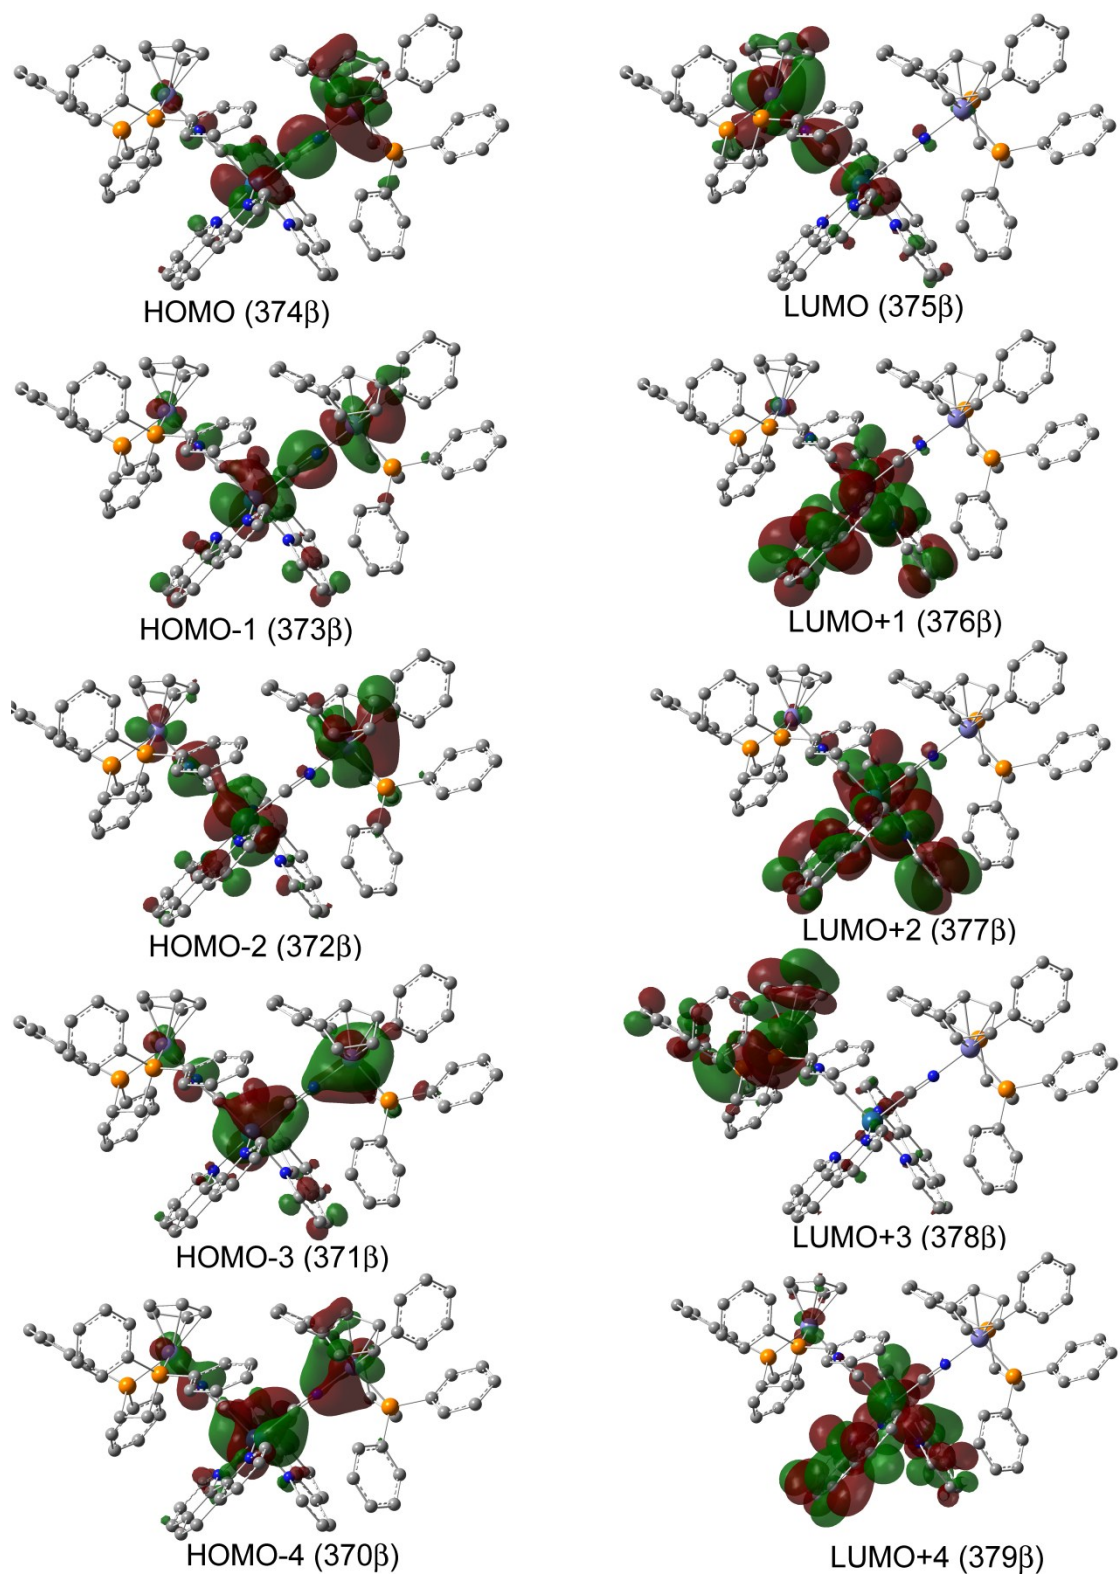

**Figure S17.** Schematic drawings of the selective frontier molecular orbitals for the  $\beta$  electron of **6**.

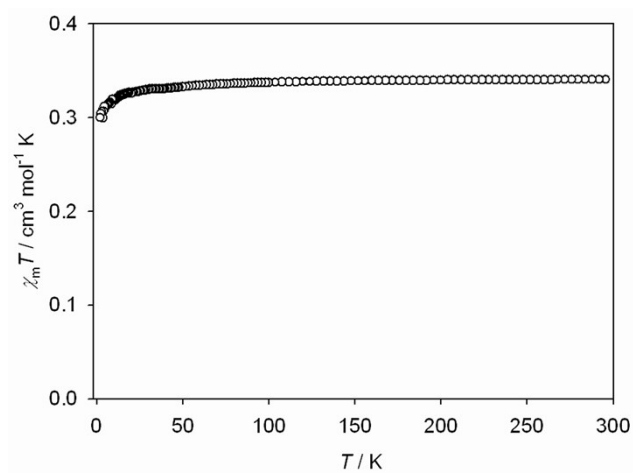

**Figure S18.** Magnetic behavior of complex **5** as measured in an applied field of 1000 Oe using a SQUID magnetometer. Temperature dependence of  $\chi_M T$  of complex **5** in polycrystalline sample.

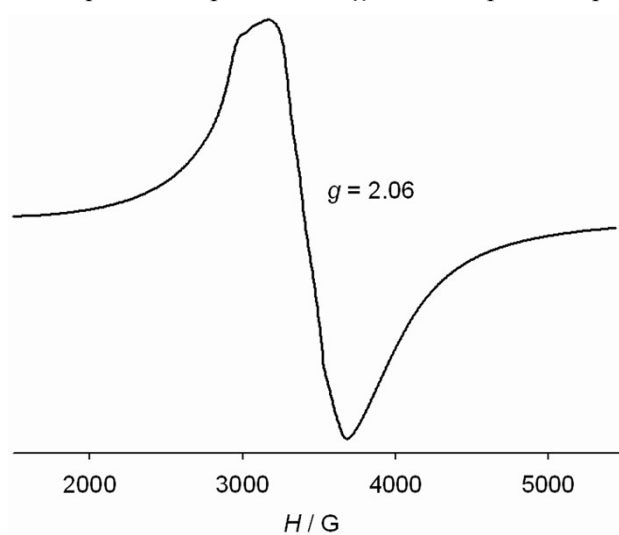

**Figure S19.** EPR spectra of complex **5** in polycrystalline sample at room temperature.

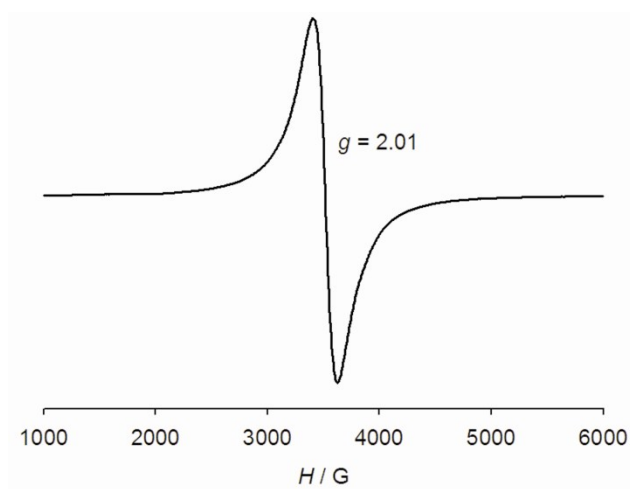

**Figure S20.** EPR spectra of complex **8** in solid sample at room temperature.

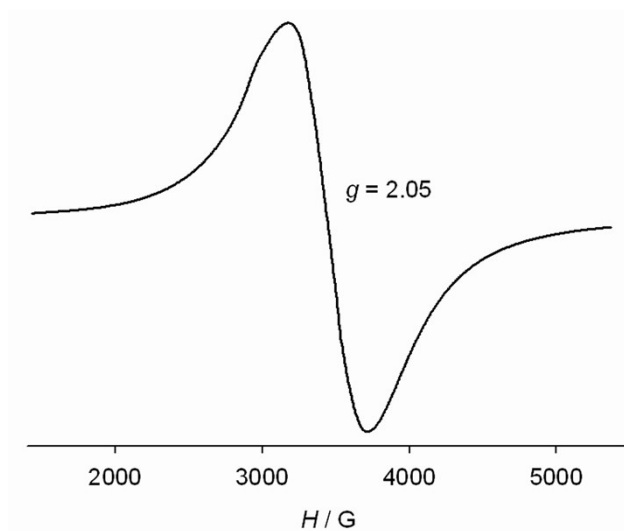

**Figure S21.** EPR spectra of complex **6** in polycrystalline sample at room temperature.

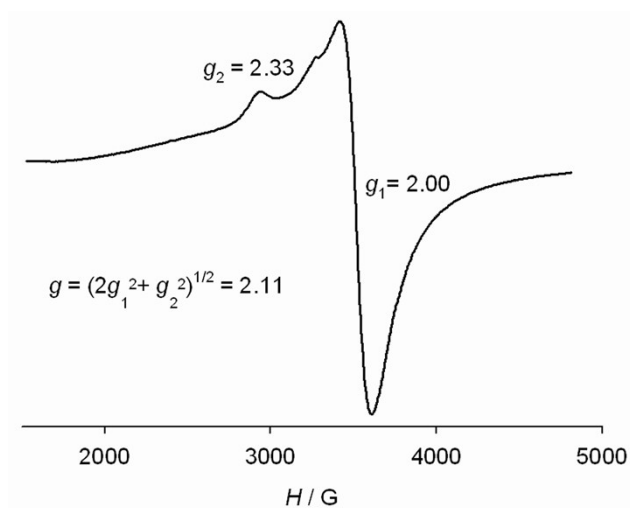

**Figure S22.** EPR spectra of complex **9** in polycrystalline sample at room temperature.

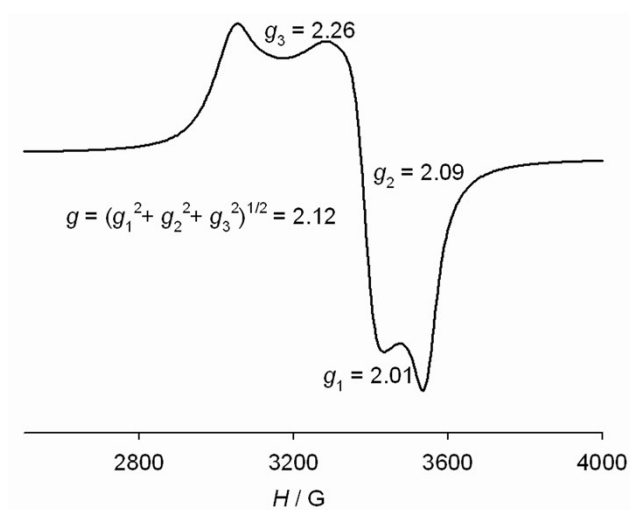

**Figure S23.** EPR spectra of complex **10** in polycrystalline sample at room temperature.

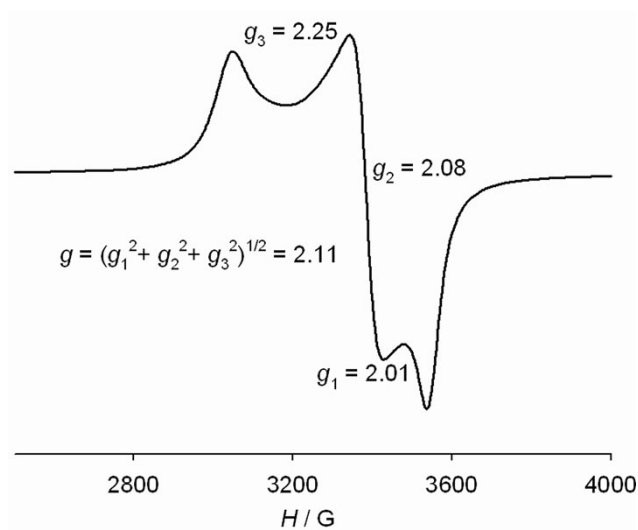

**Figure S24.** EPR spectra of complex **11** in polycrystalline sample at room temperature.

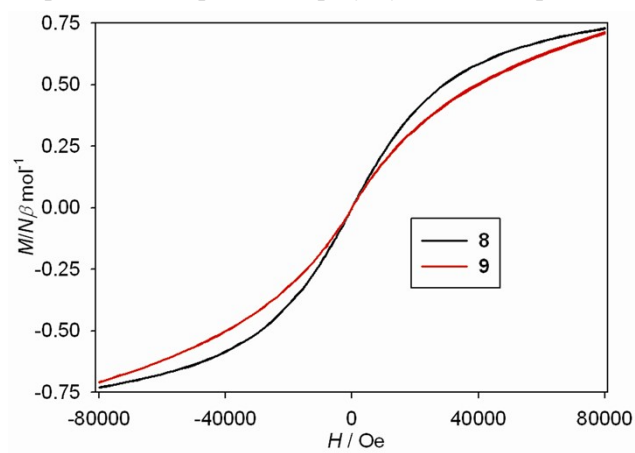

**Figure S25.** Plots of M-H for samples **8** and **9** at 2 K.
